# Supplementary material
Source: PubMed Central journal article supplement (PMC3415561)
Supplement: NIHMS380572-supplement-1_si_001.pdf [file NIHMS380572-supplement-1_si_001.pdf]

# SUPPORTING INFORMATION

## Construction of Covalent Membrane Protein Complexes and High-throughput Selection of Membrane Mimics

Jae-Eun Suk, Alan J. Situ and Tobias S. Ulmer

Department of Biochemistry & Molecular Biology and Zilkha Neurogenetic Institute, Keck School of Medicine, University of Southern California, 1501 San Pablo Street, Los Angeles, California 90033, United States

### TABLE OF CONTENTS

|                                                                                                                      |     |
|----------------------------------------------------------------------------------------------------------------------|-----|
| <b>Experimental details</b>                                                                                          | S2  |
| <b>Figure S1.</b> Gel electrophoresis of $\alpha$ IIB $\beta$ 3 TM dimerization reactions                            | S5  |
| <b>Figure S2.</b> Gel electrophoresis of $\alpha$ IIB $\beta$ 3 TM dimerization reactions under different conditions | S6  |
| <b>Figure S3.</b> Terminal oxidation of $\beta$ 3(G690C)                                                             | S7  |
| <b>Figure S4.</b> Relative quantities of accumulated $\alpha$ IIB $\beta$ 3 TM species                               | S8  |
| <b>Figure S5.</b> H-N spectra of $\alpha$ IIB $\beta$ 3 TM in DHPC/POPC bicelles and SDS micelles                    | S8  |
| <b>Figure S6.</b> CD spectra of refolded off7- $\alpha$ IIB(A963C) and MBP- $\beta$ 3(G690C)                         | S9  |
| <b>Figure S7.</b> Template-assisted integrin $\alpha$ IIB $\beta$ 3 TM dimerization                                  | S10 |
| <b>Figure S8.</b> H-N spectra of covalently and non-covalently associated $\alpha$ IIB $\beta$ 3 TM peptides         | S11 |
| <b>References</b>                                                                                                    | S11 |

## EXPERIMENTAL DETAILS

**Protein expression and purification.** All protein expression vectors were based on the commercial pET44 vector (Novagen, Inc.). To overexpress human integrin  $\beta 3$  residues Glu686-Phe727 incorporating C687S/G690C with a preceding tobacco etch virus (TEV) protease cleavage site (ENLYFQ|G), the original pET44 NusTag fusion protein was replaced with either *E. coli* maltose binding protein (MBP) or the third IgG binding domain of protein G (GB3), yielding vectors pET44-MBP- $\beta 3$ (G690C) and pET44-GB3- $\beta 3$ (G690C), respectively. To express human integrin  $\alpha$ IIb residues Ala958-Pro998 incorporating A963C with the preceding TEV site, the previously used pET44-based vector<sup>1</sup> was amended to give pET44-GB3- $\alpha$ IIb(A963C). The GB3 fusion protein was also replaced with a gene coding for the His<sub>6</sub>-tagged MBP-binding ankyrin repeat protein off7,<sup>2</sup> which was assembled from overlapping, synthetic oligonucleotides by PCR.<sup>3</sup> A third construct incorporating GB3 as second, N-terminal fusion protein was prepared as well, resulting in pET44-GB3-off7- $\alpha$ IIb(A963C).

Expression and purification of all constructs proceeded as described for pET44-GB3- $\alpha$ IIb.<sup>1</sup> In brief, gene expression was induced in *E. coli* BL21(DE3)pLysS,T1<sup>R</sup> cells (Sigma-Aldrich, Inc.) growing in M9 minimal medium at 37 °C by adding IPTG to a final concentration of 0.5 mM at A(600 nm)= 1.0. Cells were harvested after four hours and lysed by sonication in 50 mM Na<sub>2</sub>HPO<sub>4</sub>/NaH<sub>2</sub>PO<sub>4</sub>, pH 7.4, 300 mM NaCl, 100 mM SDS, 20 mM imidazole and 2 mM  $\beta$ -mercaptoethanol. The His<sub>6</sub>-tagged proteins were purified by immobilized metal affinity chromatography (IMAC) using Ni<sup>2+</sup>-based resin and eluted in 50 mM Na<sub>2</sub>HPO<sub>4</sub>/NaH<sub>2</sub>PO<sub>4</sub>, pH 7.4, 300 mM NaCl, 8 M urea, and 300 mM imidazole. Dialyzing against 50 mM Tris·HCl pH 8.0 and 0.5 mM EDTA overnight at 4 °C, allowed the refolding of fusion proteins in the absence of lipids/detergents as judged by CD spectroscopy (Figure S6). Specifically we note that, although folded MBP- $\beta 3$ (G690C) is soluble in aqueous solution, MBP refolding should be carried out at  $\leq 2$   $\mu$ M to avoid protein aggregation and precipitation.<sup>4</sup> Protein concentrations were measured by UV spectroscopy.<sup>5</sup>

**Analytical covalent dimer formation.** For analytical assays,  $\alpha$ Ib(A963C) and  $\beta$ 3(G690C)-containing proteins were mixed in a volume of 100  $\mu$ l at final concentrations of 10  $\mu$ M each in 50 mM Tris-HCl, pH 8.0 and 0.5 mM EDTA. The solution contained the bicelles/micelles depicted in Figure 2/figure S1 at a molar ratio of  $\alpha$ Ib: $\beta$ 3:short-chain lipid/detergent:long-chain lipid of 1:1:2000:600 unless otherwise stated. For samples in organic solvents, proteins were prepared in CH<sub>3</sub>CN/H<sub>2</sub>O (1:1 v/v), 25 mM Hepes-NaOH, pH 7.4 or CH<sub>3</sub>CN/H<sub>2</sub>O/TFA (49.5:49.5:0.1 v/v) solution. Spontaneously formed cysteines were reduced by adding tributylphosphine (TBP) or Tris(2-carboxyethyl)phosphine (TCEP) to final concentrations of 5 mM and incubating for 2 hr at 30 °C (Figure S1A). The use of either TBP or TCEP gave similar results (c.f. Figure 2A and Figure S4A). Disulfide bond formation was accelerated by adding the hydrophobic oxidant Cu<sup>2+</sup>·(phenanthroline)<sub>2</sub> to 2.5 mM and was allowed to proceed at room temperature for 1 hours (c.f. Figure S2B). The Cu<sup>2+</sup>·(phenanthroline)<sub>2</sub> complex was prepared freshly by mixing equal volumes of 200 mM CuSO<sub>4</sub> in water and 400 mM 1,10-phenanthroline in *N,N*-dimethylformamide.<sup>6</sup> To disintegrate the Cu<sup>2+</sup>·(phenanthroline)<sub>2</sub> complex and block any remaining free cysteines, EDTA and *N*-ethylmaleimide (NEM) were added to final concentrations of 10 and 2 mM, respectively. Subsequently, SDS-PAGE was performed using 4-20% Tris-Hepes or 4-20% Tris-Tricine gels (Nusep, Inc.). Non-covalent dimer formation during SDS-PAGE is negligible (Figure S1A). Samples containing organic solvent were freeze-dried before performing SDS-PAGE.

Coomassie blue-stained gels were scanned and gel band intensities were integrated using the program Image J.<sup>7</sup> At identical protein concentrations, GB3-off7- $\alpha$ Ib(A963C) exhibited a 2.85-times higher staining intensity than GB3- $\beta$ 3(G690C) over the concentration ranges used in the present study (for example, Figure S1A). When considering dimer-staining intensities to be the linear sum of their constituent monomer intensities, staining intensities, *I*, relative to an equimolar amount of 1*I* <sub>$\alpha$</sub>  are 2.85*I* <sub>$\beta$</sub> , 0.5*I* <sub>$\alpha\alpha$</sub> , 1.43*I* <sub>$\beta\beta$</sub>  and 0.74*I* <sub>$\alpha\beta$</sub> . Obtained gel band intensities were converted to relative molar ratios accordingly (e.g., Figure 2A and Figure S1B). In dimerization reactions with only one GB3 fusion protein present on either the  $\alpha$ Ib or  $\beta$ 3 subunit, integrated gel band intensities were compared directly and are

expected to approximate the mass distribution of the GB3-tagged subunit (Figure 2B, Figures S1C-D and S4B).

**Covalent dimer formation on a preparative scale.** To construct disulfide-linked  $\alpha$ Ib(A963C)- $\beta$ 3(G690C) on a preparative scale, GB3- $\alpha$ Ib(A963C) and GB3- $\beta$ 3(G690C) or, alternatively  $\alpha$ Ib(A963C) and  $\beta$ 3(G690C) derived from GB3 constructs, were mixed at final concentrations of 100  $\mu$ M in 50 mM Tris-HCl, pH 8.0, 0.5 mM EDTA, 20 mM CHAPS, 6 mM DMPC solution. Subsequent to reduction with 1.25 mM TCEP, disulfide formation was assisted for 1 hr by adding  $\text{Cu}^{2+}$ -(phenanthroline)<sub>2</sub> to 3.125 mM. If applicable, GB3 fusion proteins were cleaved, following dialysis against 50 mM Tris-HCl, pH 8.0, 0.5 mM EDTA, 0.5 M urea, by TEV protease at a molar ratio of 1:50 in the presence of reduced and oxidized glutathione at 1 mM and 0.1 mM, respectively. Heterodimer was subsequently purified by reversed-phase HPLC as described previously for monomeric peptide.<sup>1</sup>

**NMR spectroscopy.** TROSY-HSQC spectra<sup>8</sup> were recorded at 28 °C with acquisition times of 85.4 and 71.7 ms in the <sup>1</sup>H<sup>N</sup> and <sup>15</sup>N dimension, respectively, which avoids truncation artifacts for residues outside of the membrane (Figure 1A). <sup>15</sup>N longitudinal and transverse relaxation rates were measured<sup>9</sup> at 35 °C using a CPMG delay of 400  $\mu$ s. Backbone H-N residual dipolar couplings, <sup>1</sup>D<sub>NH</sub>, were measured at 40 °C using the ARTSY scheme.<sup>10</sup> A negatively charged polyacrylamide gel<sup>11,12</sup> of 320  $\mu$ l volume and 6 mm diameter was polymerized from a 4.0% w/v solution of acrylamide (AA), 2-acrylamido-2-methyl-1-propanesulfonate (AMPS) and bisacrylamide (BIS) with a monomer-to-crosslinker ratio of 63:1 (w/w) and a molar ratio of 95:5 of AA to AMPS. The dried gel was soaked with 320  $\mu$ l of 0.3 mM <sup>2</sup>H/<sup>13</sup>C/<sup>15</sup>N-labeled disulfide-linked  $\alpha$ Ib $\beta$ 3(A711P), 142 mM DHPC, 43 mM DMPC, 25 mM HEPES-NaOH, pH 7.4, 6% D<sub>2</sub>O, 0.02% w/v NaN<sub>3</sub> solution. Upon transfer into an open-ended NMR tube,<sup>13</sup> a <sup>2</sup>H splitting of 0.4 Hz was observed. All experiments were recorded using a cryoprobe-equipped Bruker Avance 700 spectrometer and processed using the nmrPipe package.<sup>14</sup>

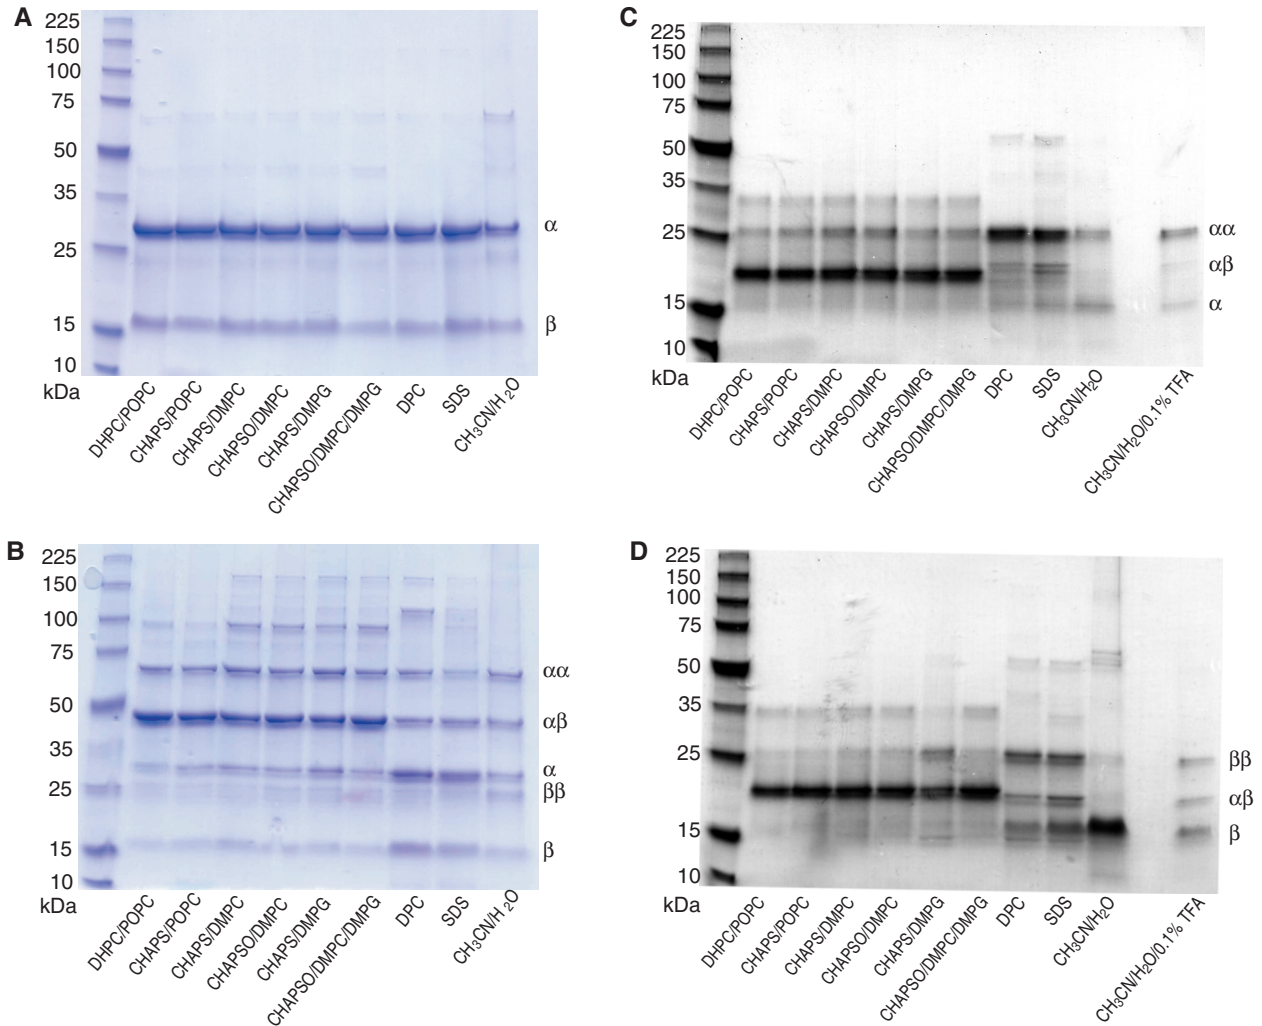

**Figure S1.** Gel electrophoresis of  $\alpha$ IIb $\beta$ 3 TM dimerization reactions. **(A)** GB3-off7- $\alpha$ IIb(A963C) and GB3- $\beta$ 3(G690C) proteins subsequent to reduction by tributylphosphine (TBP). **(B)** Dimer formation of GB3-off7- $\alpha$ IIb(A963C) and GB3- $\beta$ 3(G690C) as a function of membrane mimic. Shown is a 4-20% Tris-Hepes gels of reactions employing protein concentrations of 10  $\mu$ M and a molar ratio of  $\alpha$ IIb: $\beta$ 3:short-chain lipid/detergent:long-chain lipid of 1:1:2000:600. **(C-D)** Dimer formation of GB3- $\alpha$ IIb(A963C) and  $\beta$ 3(G690C) or, alternatively,  $\alpha$ IIb(A963C) and GB3- $\beta$ 3(G690C) as a function of membrane mimic. Shown are 4-20% Tris-Tricine gels of reactions employing protein concentrations of 10  $\mu$ M and a molar ratio of  $\alpha$ IIb: $\beta$ 3:short-chain lipid/detergent:long-chain lipid of 1:1:2000:600. Without GB3 present, monomeric and homodimeric  $\beta$ 3(G690C) or  $\alpha$ IIb(A963C) peptides ran as "smeared" bands, resulting from the immersion in and interference with migrating SDS micelles, that remained virtually undetectable.

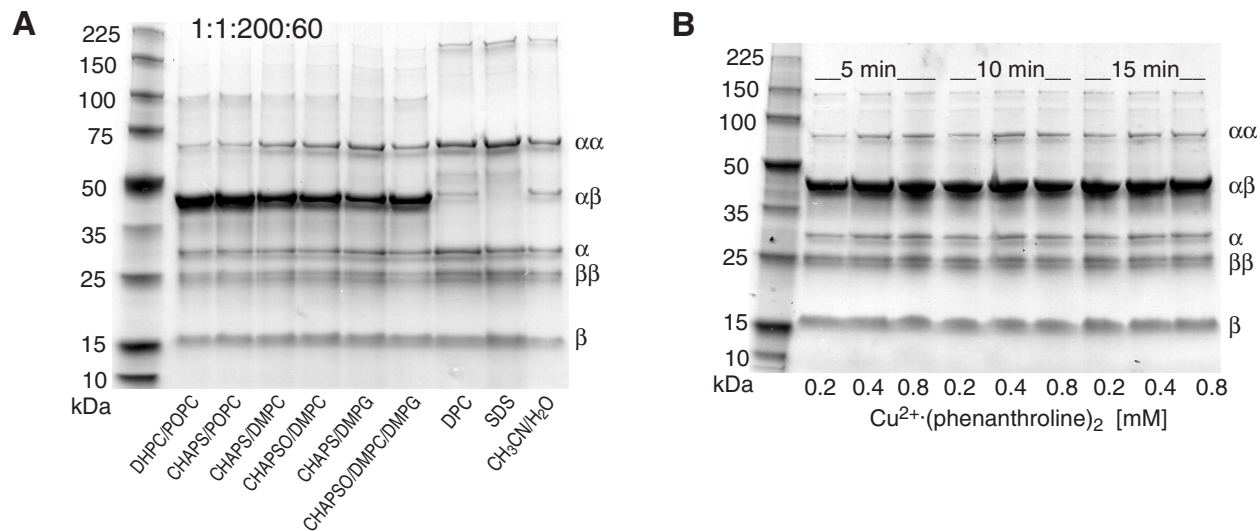

**Figure S2.** Gel electrophoresis of  $\alpha$ IIb $\beta$ 3 TM dimerization reactions at different conditions. **(A)** Identical conditions to Figure S1B were used except for protein concentrations of 100  $\mu$ M at a molar ratio of  $\alpha$ IIb: $\beta$ 3:short-chain lipid/detergent:long-chain lipid of 1:1:200:60. **(B)** The time and Cu<sup>2+</sup>·(phenanthroline)<sub>2</sub> concentration dependence of covalent 10  $\mu$ M GB3-off7- $\alpha$ IIb(A963C) and 10  $\mu$ M GB3- $\beta$ 3(G690C) dimerization in 20 mM DHPC/6 mM POPC was examined. Proteins were reduced with 1 mM TCEP and oxidized with Cu<sup>2+</sup>·(phenanthroline)<sub>2</sub> as indicated.

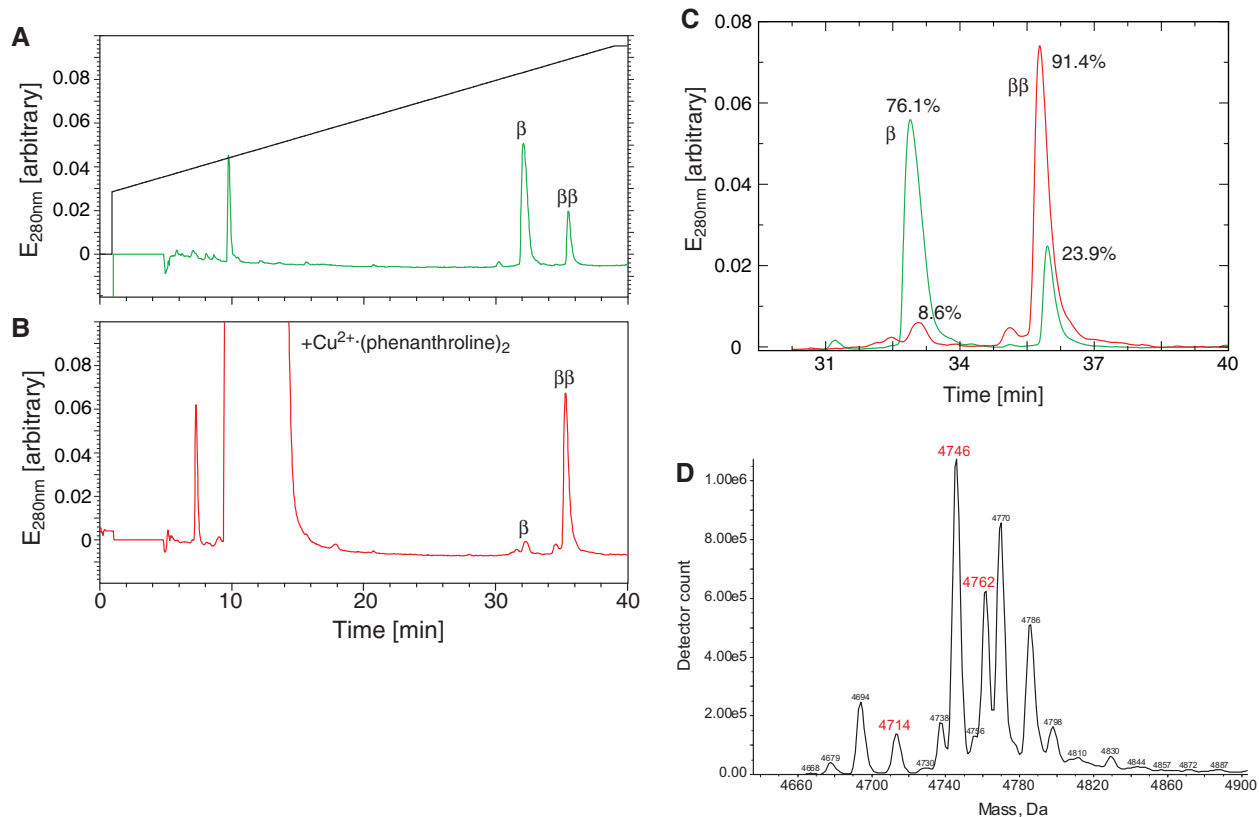

**Figure S3.** Terminal oxidation of  $\beta 3(\text{G690C})$ . (A-B)  $100 \mu\text{M}$   $\beta 3(\text{G690C})$  was reduced by  $1 \text{ mM}$  TCEP in the presence of  $200 \text{ mM}$  SDS for  $2 \text{ hr}$ . Subsequently, disulfide bond formation was allowed to take place either spontaneously (panel A) or assisted by  $5 \text{ mM}$   $\text{Cu}^{2+}\cdot(\text{phenanthroline})_2$  (panel B). After incubating for  $1 \text{ hr}$ ,  $10 \text{ mM}$  EDTA was added and HPLC was performed using a Agilent Zorbax 300SB-C18 column ( $4.6 \times 250 \text{ mm}$ ). A linear gradient, ranging from  $30\%$  to  $100\%$  of buffer B ( $49.5\%$  n-propanol,  $49.5\%$   $\text{CH}_3\text{CN}$ ,  $0.1\%$  TFA) was performed over a period of  $40 \text{ min}$ . Buffer A consisted of  $0.1\%$  TFA. (C) Integration of peak areas of eluted monomer and dimeric  $\beta 3(\text{G690C})$  peptides suggested that  $8.6\%$  of total  $\beta 3(\text{G690C})$  peptide was incapable of forming dimer. (D) Mass reconstruction from electrospray mass spectrometry of the remaining  $\beta 3(\text{G690C})$  monomer peak upon  $\text{Cu}^{2+}\cdot(\text{phenanthroline})_2$  oxidation. For the intact sulfhydryl of Cys690, a mass of  $4714 \text{ Da}$  would be expected and was observed, but dominating were oxidized forms. Oxidation of Cys690 was therefore terminal with respect to forming a disulfide bond.

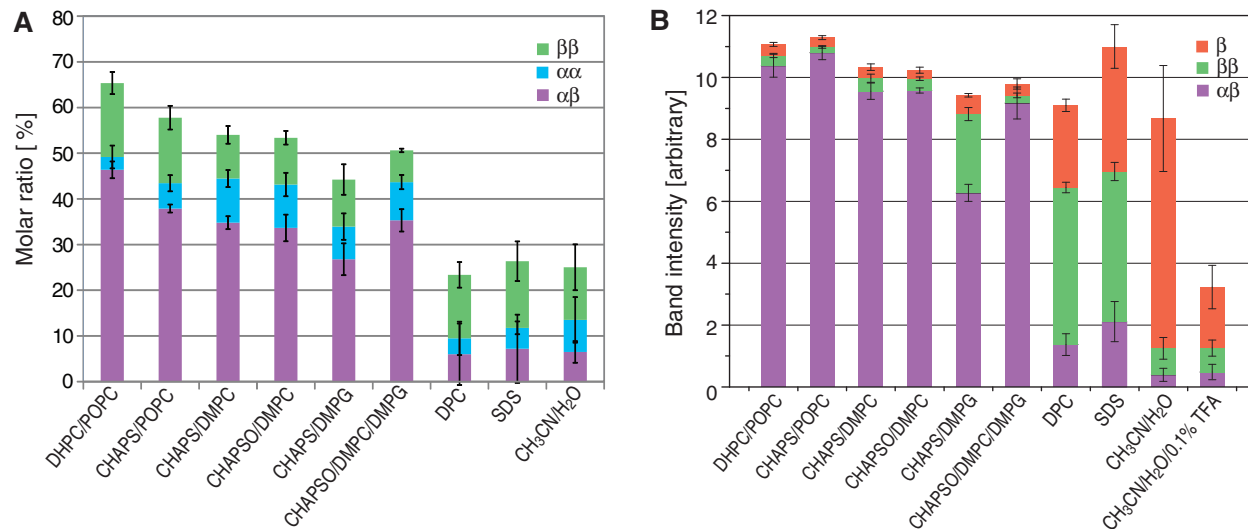

**Figure S4.** Relative quantities of accumulated  $\alpha$ IIb $\beta$ 3 TM species as a function of membrane mimic. **(A)** Dimeric species obtained with GB3-off7- $\alpha$ IIb(Ala963Cys) and GB3- $\beta$ 3(Gly690Cys) proteins and the reducing agent TCEP (Tris(2-carboxyethyl)phosphine) instead of TBP (c.f. Figure 2A). The size of each color-coded bar denotes its molar ratio among  $\alpha$ ,  $\beta$ ,  $\alpha\alpha$ ,  $\beta\beta$  and  $\alpha\beta$  species. For visual clarity, explicit bars were omitted for  $\alpha$  and  $\beta$ . **(B)** Species obtained with  $\alpha$ IIb(Ala963Cys) and GB3- $\beta$ 3(Gly690Cys) proteins and TCEP. The size of each color-coded bar approximates the mass distribution of GB3-tagged  $\beta$ 3 among  $\beta$ ,  $\beta\beta$  and  $\alpha\beta$  species. DHPC/POPC and CHAPS/POPC bicelles, which were indistinguishable within experimental uncertainties, were identified as best membrane mimics. In all experiments the molar ratio of  $\alpha$ IIb: $\beta$ 3:short-chain lipid/detergent:long-chain lipid was 1:1:2000:600 with protein concentrations of 10  $\mu$ M. Error bars denote the standard error of the mean of three experiments.

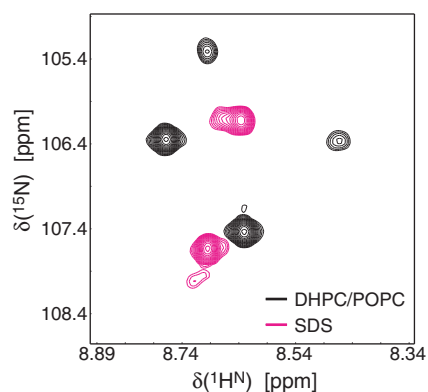



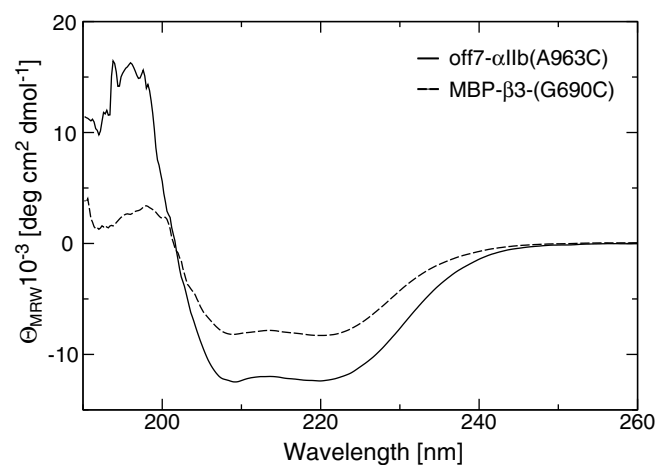

**Figure S6.** Characterization of refolded off7- $\alpha$ IIb(A963C) and MBP- $\beta$ 3(G690C). CD spectra of refolded off7- $\alpha$ IIb(A963C) and MBP- $\beta$ 3(G690C) in 10 mM  $\text{KH}_2\text{PO}_4/\text{K}_2\text{HPO}_4$ , pH 7.4. Protein concentrations of 10  $\mu\text{M}$  were employed. Distinct minima at 208 and 222 nm indicate predominantly helical folds in accordance with MBP and off7 structures (Figure S7B).

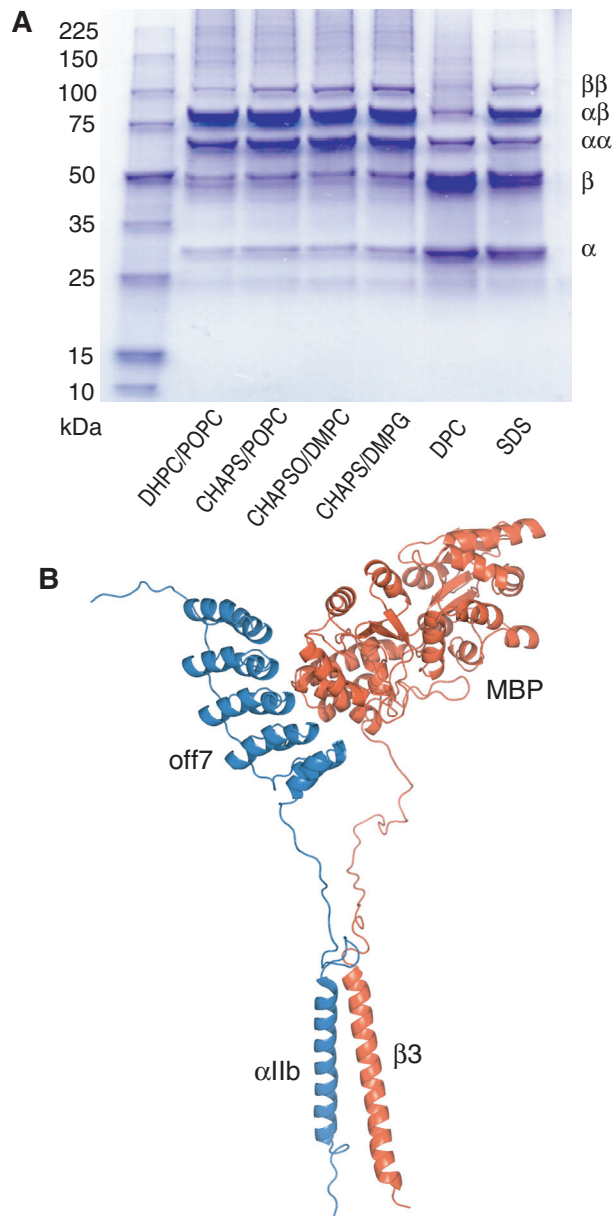

**Figure S7.** Template-assisted integrin  $\alpha$ IIb $\beta$ 3 TM dimerization. The engineered ankyrin repeat protein off7 (17 kDa) was evolved to bind maltose binding protein (MBP, 41 kDa) and does so with a  $K_D$  of  $4.4 \times 10^{-9}$  M in aqueous solution.<sup>2</sup> Since MBP is also a common fusion protein, although its larger size relative to GB3 means a substantial unproductive incorporation of isotope labeled metabolites, we tested whether heterodimerization could be assisted by MBP-off7 complex formation. **(A)** Dimerization reactions of GB3-off7- $\alpha$ IIb(A963C) and MBP- $\beta$ 3(G690C) as a function of membrane mimic; compare to Figure S1B. Shown is a 4-20% Tris-Hepes gel of dimerization reactions at a molar ratio of  $\alpha$ IIb: $\beta$ 3:short-chain lipid/detergent:long-chain lipid of 1:1:2000:600. Protein concentrations of 10  $\mu$ M were employed. It is noted that MBP and off7 lack cysteine residues. **(B)** Structural model of the off7- $\alpha$ IIb/MBP- $\beta$ 3 complex constructed from PDB entries 1svx and 2k9j using linker segments, encompassing TEV cleavage sites, of random conformation. The model was prepared using the program Modeller.<sup>15</sup>

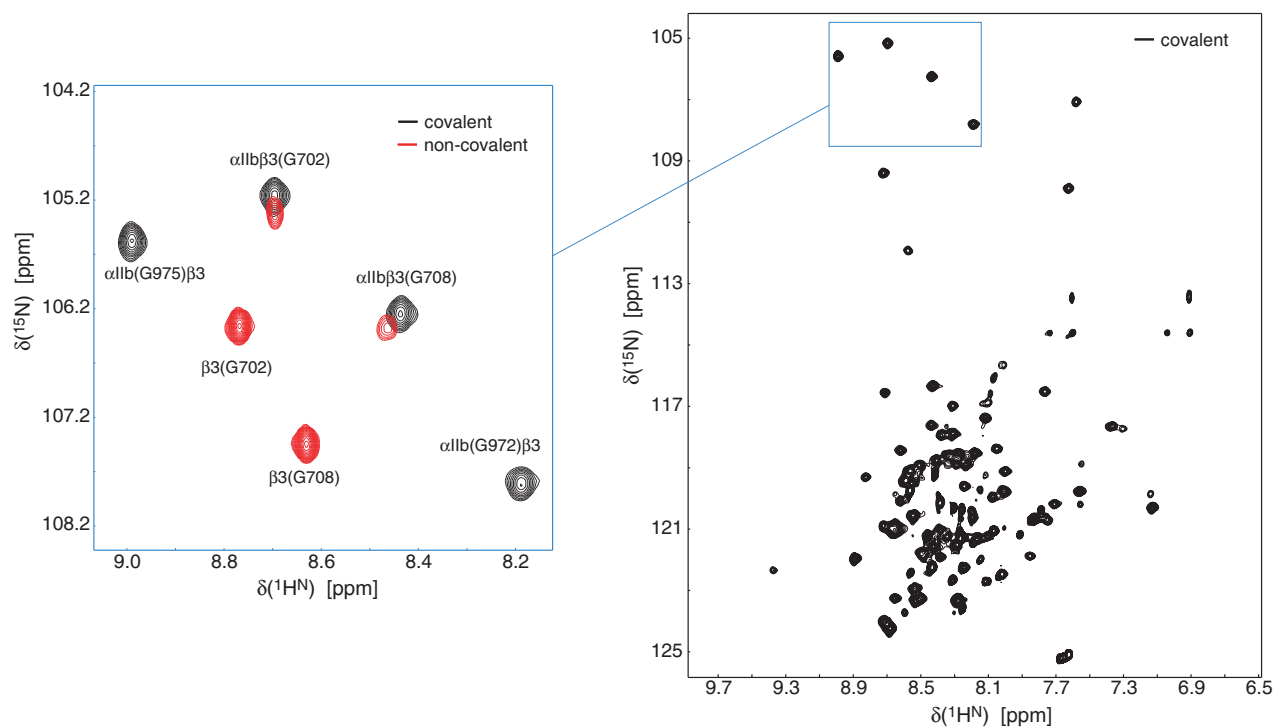

**Figure S8.** Comparison of H-N correlation spectra of covalently and non-covalently associated  $\alpha$ IIb $\beta$ 3 TM peptides.  $^1\text{H}/^{14}\text{N}$ -labeled  $\alpha$ IIb and  $^2\text{H}/^{15}\text{N}$ - $\beta$ 3 TM peptides or  $^2\text{H}/^{15}\text{N}$ -labeled, covalently linked  $\alpha$ IIb(Ala963Cys)- $\beta$ 3(Gly690Cys) peptides were reconstituted at concentrations of 0.1 mM each in 200 mM DHPC, 60 mM POPC, 25 mM HEPES-NaOH, pH 7.4. Spectra were recorded at 700 MHz and 28 °C.

## References

- (1) Lau, T.-L.; Dua, V.; Ulmer, T. S. *J. Biol. Chem.* **2008**, *283*, 16162.
- (2) Binz, H. K.; Amstutz, P.; Kohl, A.; Stumpp, M. T.; Briand, C.; Forrer, P.; Grutter, M. G.; Pluckthun, A. *Nat. Biotechnol.* **2004**, *22*, 575.
- (3) Hoover, D. M.; Lubkowski, J. *Nucleic Acids Res.* **2002**, *30*, e43.
- (4) Ganesh, C.; Zaidi, F. N.; Udgaonkar, J. B.; Varadarajan, R. *Protein Sci.* **2001**, *10*, 1635.
- (5) Gill, S. C.; Vonhippel, P. H. *Anal. Biochem.* **1989**, *182*, 319.
- (6) Shin, J. M.; Sachs, G. *J. Biol. Chem.* **1996**, *271*, 1904.
- (7) Rasband, W. S.; U. S. National Institutes of Health, Bethesda, Maryland, USA: 1997-2011.
- (8) Pervushin, K.; Riek, R.; Wider, G.; Wuthrich, K. *J. Am. Chem. Soc.* **1998**, *120*, 6394.
- (9) Zhu, G.; Xia, Y. L.; Nicholson, L. K.; Sze, K. H. *J. Magn. Reson.* **2000**, *143*, 423.
- (10) Fitzkee, N. C.; Bax, A. *J. Biomol. NMR* **2010**, *48*, 65.
- (11) Ulmer, T. S.; Ramirez, B. E.; Delaglio, F.; Bax, A. *J. Am. Chem. Soc.* **2003**, *125*, 9179.
- (12) Meier, S.; Haussinger, D.; Grzesiek, S. *J. Biomol. NMR* **2002**, *24*, 351.
- (13) Chou, J. J.; Gaemers, S.; Howder, B.; Louis, J. M.; Bax, A. *J. Biomol. NMR* **2001**, *21*, 377.
- (14) Delaglio, F.; Grzesiek, S.; Vuister, G. W.; Zhu, G.; Pfeifer, J.; Bax, A. *J. Biomol. NMR* **1995**, *6*, 277.
- (15) Sali, A.; Blundell, T. L. *J. Mol. Biol.* **1993**, *234*, 779.
